# Supplementary material
Source: publisher figshare collection journal article supplement (https://geolsoc.figshare.com/ndownloader/files/18541520)
Supplement: Supplementary file 1 [file 18541520]

|                  |                          |                                                                                                                                                                                                               |
|------------------|--------------------------|---------------------------------------------------------------------------------------------------------------------------------------------------------------------------------------------------------------|
| ■ Specimen level | •Thermal demagnetization | => Well defined primary component isolated between $T_{min} \geq T1$ and $T_{max} = T2$                                                                                                                       |
|                  | •Intensity determination | => Performed on the temperature range $[T_{min}-T_{max}]$ , where the primary component is isolated                                                                                                           |
|                  |                          | => Percentage of magnetization fraction with unblocking temperatures larger than $T_{min} \geq 50\%$                                                                                                          |
|                  |                          | => Slope of the straight line computed between the $R'$ values at $T_{min}$ and $T_{max} \leq 10\%$<br>This tests the constancy of the $R'(T)$ ratios on the $[T_{min}-T_{max}]$ temperature range considered |
| ■ Fragment level |                          | => At least n specimens $\geq 2$                                                                                                                                                                              |
|                  |                          | => Standart error (or standard deviation when $n \geq 3$ ) around the mean $\leq 5\%$                                                                                                                         |
| ■ Site level     |                          | => At least N fragments $\geq 3$                                                                                                                                                                              |
|                  |                          | => Standart deviation around the mean $\leq 5\mu T$ and $\leq 10\%$                                                                                                                                           |
